# Supplementary material
Source: publisher site journal article supplement (https://www.dovepress.com/article/436659)
Supplement: Supplementary file 1 [file get_supplementary_file.php]

Supplementary Figure 1: Survey on Patient Satisfaction Between Exam Modalities

Please indicate to which extent you agree or disagree with each of the following statements.

About teleoptometry

1. During a teleoptometry exam, I think that the optometrist can take care of my eye health without being present in the room.

Strongly agree

Agree

Neutral

Disagree

Strongly disagree

1. I would use teleoptometry services again.

Strongly agree

Agree

Neutral

Disagree

Strongly disagree

1. I think my teleoptometry exam was as good as an ordinary in-person visit.

Strongly agree

Agree

Neutral

Disagree

Strongly disagree

Exam comparison

1. Which type of eye exam did you prefer?

Definitely in person

Rather in person

One or the other

Rather in teleoptometry

Definitely in teleoptometry

1. Which type of exam would you recommend to others?

Definitely in person

Rather in person

One or the other

Rather in teleoptometry

Definitely in teleoptometry

Supplementary Figure 2: Survey on Visual Comfort Between Trial Frames

Glasses #1

Please indicate to which extent you agree or disagree with each of the following statements.

1. My distance vision is excellent.

Strongly agree

Agree

Neutral

Disagree

Strongly disagree

1. The images do not seem distorted when I look around.

Strongly agree

Agree

Neutral

Disagree

Strongly disagree

1. I do not feel dizzy when I move around with the trial glasses.

Strongly agree

Agree

Neutral

Disagree

Strongly disagree

1. I would like to wear this prescription in everyday life.

Strongly agree

Agree

Neutral

Disagree

Strongly disagree

Glasses #2

Please indicate to which extent you agree or disagree with each of the following statements.

1. My distance vision is excellent.

Strongly agree

Agree

Neutral

Disagree

Strongly disagree

1. The images do not seem distorted when I look around.

Strongly agree

Agree

Neutral

Disagree

Strongly disagree

1. I do not feel dizzy when I move around with the trial glasses.

Strongly agree

Agree

Neutral

Disagree

Strongly disagree

1. I would like to wear this prescription in everyday life.

Strongly agree

Agree

Neutral

Disagree

Strongly disagree

Glasses comparison

Which glasses do you prefer?

Strongly #1

Rather #1

One or the other

Rather #2

Strongly #2
